# Supplementary material
Source: MDPI journal article supplement (https://www.mdpi.com/2673-4532/1/1/4)
Supplement: s1 [file s1]

## Supplementary Material

# Analysis of Derivatized N-Acyl Amino Acid Surfactants using HPLC and HPLC/MS

Petra Valigurová <sup>1</sup>, Lenka Jarešová <sup>1</sup>, Jana Váňová <sup>1</sup> and Petr Česla <sup>1,\*</sup>

<sup>1</sup> University of Pardubice, Faculty of Chemical Technology, Department of Analytical Chemistry, Studentská 573, CZ-53210 Pardubice, Czech Republic; Petr.Cesla@upce.cz

\* Correspondence: Petr.Cesla@upce.cz; Tel.: +420-466-037-368

**Table S1.** Signals for protonated molecules  $[M+H]^+$  of native and derivatized N-acyl-glutamate surfactants (CS-11, CS-22, CT-12S, ECS-22SB) with different fatty acid moieties; BPAE = 4'-bromophenacyl esters of surfactants, diBPAE = corresponding diesters.

| Fatty acid      | Native surfactant                                             |           | BPAE                                                            |           | diBPAE                                                                       |           |
|-----------------|---------------------------------------------------------------|-----------|-----------------------------------------------------------------|-----------|------------------------------------------------------------------------------|-----------|
|                 | Formula                                                       | $[M+H]^+$ | Formula                                                         | $[M+H]^+$ | Formula                                                                      | $[M+H]^+$ |
| Caprylic, C8:0  | C <sub>13</sub> H <sub>24</sub> O <sub>5</sub> N <sup>+</sup> | 274.2     | C <sub>21</sub> H <sub>29</sub> O <sub>6</sub> NBr <sup>+</sup> | 470.1     | C <sub>29</sub> H <sub>34</sub> O <sub>7</sub> NBr <sub>2</sub> <sup>+</sup> | 666.1     |
| Capric, C10:0   | C <sub>15</sub> H <sub>28</sub> O <sub>5</sub> N <sup>+</sup> | 302.2     | C <sub>23</sub> H <sub>33</sub> O <sub>6</sub> NBr <sup>+</sup> | 498.1     | C <sub>31</sub> H <sub>38</sub> O <sub>7</sub> NBr <sub>2</sub> <sup>+</sup> | 694.1     |
| Lauric, C12:0   | C <sub>17</sub> H <sub>32</sub> O <sub>5</sub> N <sup>+</sup> | 330.2     | C <sub>25</sub> H <sub>37</sub> O <sub>6</sub> NBr <sup>+</sup> | 526.2     | C <sub>33</sub> H <sub>42</sub> O <sub>7</sub> NBr <sub>2</sub> <sup>+</sup> | 722.1     |
| Myristic, C14:0 | C <sub>19</sub> H <sub>36</sub> O <sub>5</sub> N <sup>+</sup> | 358.3     | C <sub>27</sub> H <sub>41</sub> O <sub>6</sub> NBr <sup>+</sup> | 554.2     | C <sub>35</sub> H <sub>46</sub> O <sub>7</sub> NBr <sub>2</sub> <sup>+</sup> | 750.2     |
| Palmitic, C16:0 | C <sub>21</sub> H <sub>40</sub> O <sub>5</sub> N <sup>+</sup> | 386.3     | C <sub>29</sub> H <sub>45</sub> O <sub>6</sub> NBr <sup>+</sup> | 582.2     | C <sub>37</sub> H <sub>50</sub> O <sub>7</sub> NBr <sub>2</sub> <sup>+</sup> | 778.2     |
| Oleic, C18:1    | C <sub>23</sub> H <sub>42</sub> O <sub>5</sub> N <sup>+</sup> | 412.3     | C <sub>31</sub> H <sub>47</sub> O <sub>6</sub> NBr <sup>+</sup> | 608.3     | C <sub>39</sub> H <sub>52</sub> O <sub>7</sub> NBr <sub>2</sub> <sup>+</sup> | 804.2     |

**Table S2.** Signals for protonated molecules  $[M+H]^+$  of native and derivatized N-acyl-threoninate surfactant (ET-CS-12) with different fatty acid moieties; BPAE = 4'-bromophenacyl esters of surfactant.

| Fatty acid      | Native surfactant                                             |           | BPAE                                                            |           |
|-----------------|---------------------------------------------------------------|-----------|-----------------------------------------------------------------|-----------|
|                 | Formula                                                       | $[M+H]^+$ | Formula                                                         | $[M+H]^+$ |
| Caprylic, C8:0  | C <sub>12</sub> H <sub>24</sub> O <sub>4</sub> N <sup>+</sup> | 246.2     | C <sub>20</sub> H <sub>29</sub> O <sub>5</sub> NBr <sup>+</sup> | 442.1     |
| Capric, C10:0   | C <sub>14</sub> H <sub>28</sub> O <sub>4</sub> N <sup>+</sup> | 274.2     | C <sub>22</sub> H <sub>33</sub> O <sub>5</sub> NBr <sup>+</sup> | 470.2     |
| Lauric, C12:0   | C <sub>16</sub> H <sub>32</sub> O <sub>4</sub> N <sup>+</sup> | 302.2     | C <sub>24</sub> H <sub>37</sub> O <sub>5</sub> NBr <sup>+</sup> | 498.2     |
| Myristic, C14:0 | C <sub>18</sub> H <sub>36</sub> O <sub>4</sub> N <sup>+</sup> | 330.3     | C <sub>26</sub> H <sub>41</sub> O <sub>5</sub> NBr <sup>+</sup> | 526.2     |
| Palmitic, C16:0 | C <sub>20</sub> H <sub>40</sub> O <sub>4</sub> N <sup>+</sup> | 358.3     | C <sub>28</sub> H <sub>45</sub> O <sub>5</sub> NBr <sup>+</sup> | 554.2     |
| Oleic, C18:1    | C <sub>22</sub> H <sub>42</sub> O <sub>4</sub> N <sup>+</sup> | 384.3     | C <sub>30</sub> H <sub>47</sub> O <sub>5</sub> NBr <sup>+</sup> | 580.3     |

**Table S3.** Signals for protonated molecules  $[M+H]^+$  of native and derivatized N-acyl-glycine surfactants (GCK-12H, GCS-12K) with different fatty acid moieties; BPAE = 4'-bromophenacyl esters of surfactants.

| Fatty acid      | Native surfactant    |           | BPAE                   |           |
|-----------------|----------------------|-----------|------------------------|-----------|
|                 | Formula              | $[M+H]^+$ | Formula                | $[M+H]^+$ |
| Caprylic, C8:0  | $C_{10}H_{20}O_3N^+$ | 202.1     | $C_{18}H_{25}O_4NBr^+$ | 398.2     |
| Capric, C10:0   | $C_{12}H_{24}O_3N^+$ | 230.2     | $C_{20}H_{29}O_4NBr^+$ | 426.1     |
| Lauric, C12:0   | $C_{14}H_{28}O_3N^+$ | 258.2     | $C_{22}H_{33}O_4NBr^+$ | 454.2     |
| Myristic, C14:0 | $C_{16}H_{32}O_3N^+$ | 287.2     | $C_{24}H_{37}O_4NBr^+$ | 482.2     |
| Palmitic, C16:0 | $C_{18}H_{36}O_3N^+$ | 314.3     | $C_{26}H_{41}O_4NBr^+$ | 510.2     |
| Oleic, C18:1    | $C_{20}H_{38}O_3N^+$ | 340.3     | $C_{28}H_{43}O_4NBr^+$ | 536.2     |

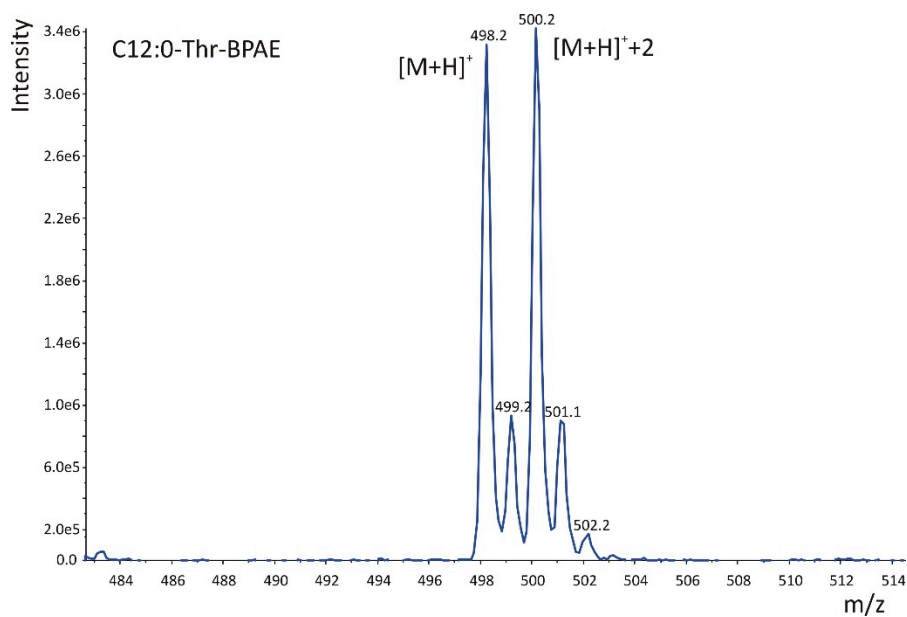

**Figure S1.** Isotopic pattern of protonated molecule of the 4'-bromophenacyl ester derivative of N-lauryl-threoninate surfactant determined using LC/MS.

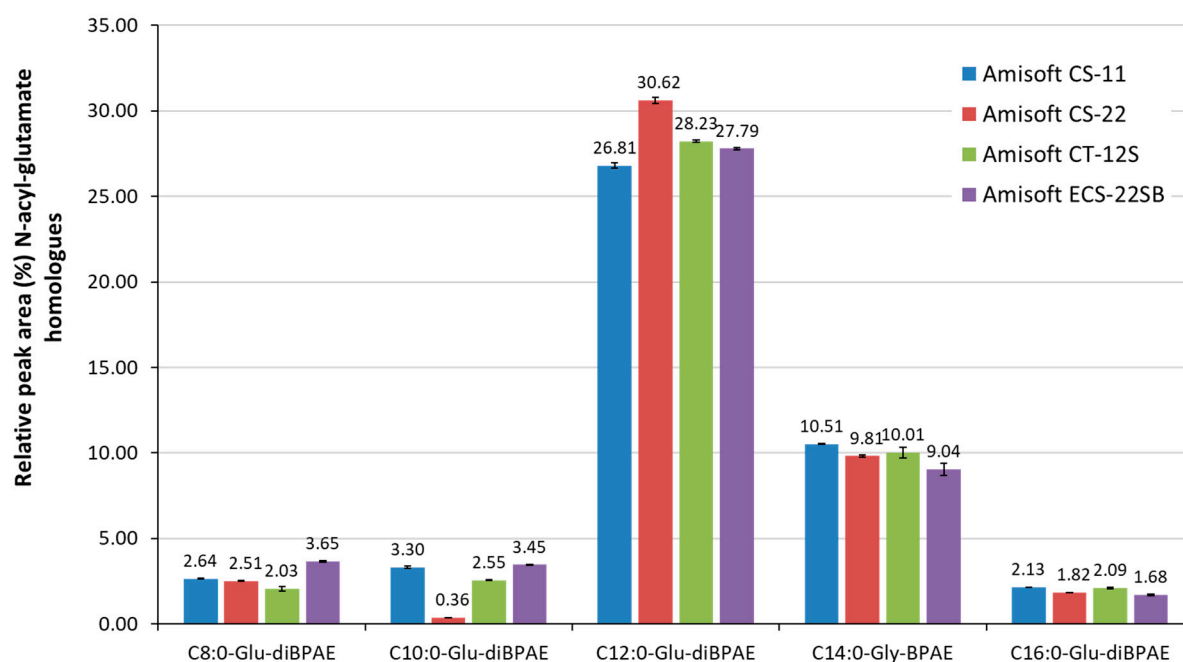

**Figure S2.** Relative content of *N*-acyl-glutamate homologues (expressed as relative peak area of a homologue with respect to surfactants in the chromatogram) determined using LC after derivatization with 2,4'-dibromoacetophenone, yielding corresponding di-4'-bromophenacyl esters (diBPAAE). The data are shown as average value of three repetitive analyses with error bars as the standard deviations.

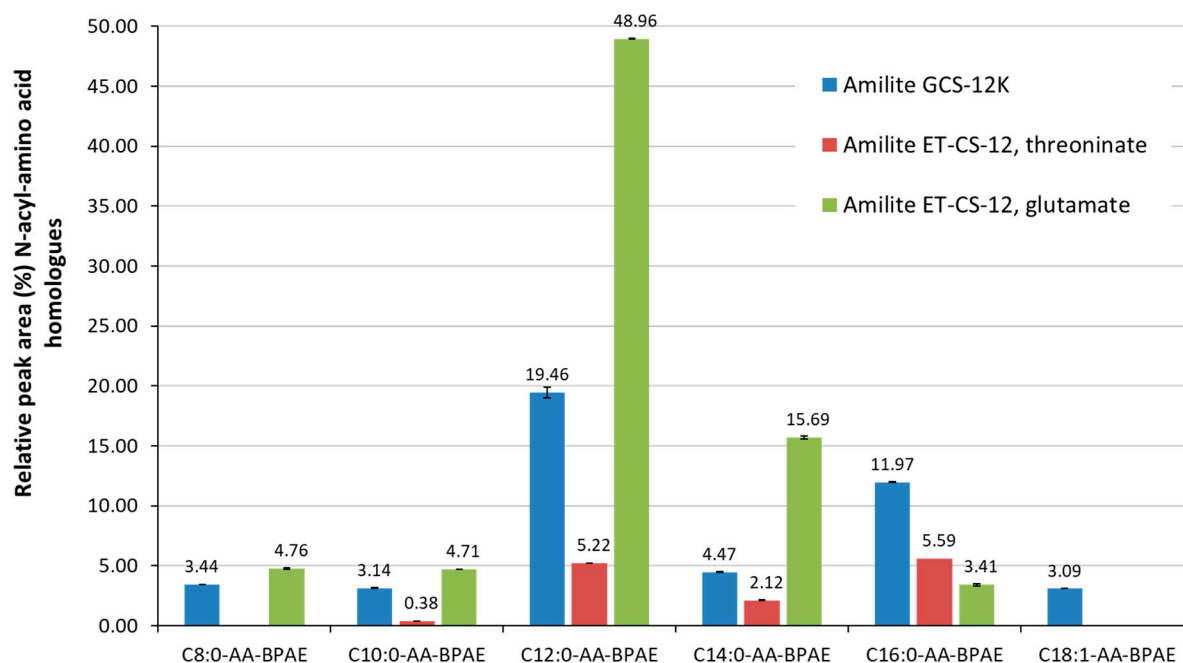

**Figure S3.** Relative content of *N*-acyl-amino acid (AA) homologues (expressed as relative peak area of a homologue with respect to surfactants in the chromatogram) determined using LC after derivatization with 2,4'-dibromoacetophenone, yielding corresponding mono- (BPAAE) and di-4'-bromophenacyl esters (diBPAAE). The data are shown as average value of three repetitive analyses with error bars as the standard deviations.
